# Supplementary material for: Genetic Analysis and Molecular Mapping of the Quantitative Trait Loci Governing Low Phytic Acid Content in a Novel LPA Rice Mutant, PLM11
Source: PubMed Central journal article supplement (PMC7762397; doi:10.3390/plants9121728), 2020-12-08
Supplement: plants-09-01728-s001.pdf [file plants-09-01728-s001.pdf]

# Genetic Analysis and Molecular Mapping of the Quantitative Trait Loci Governing Low Phytic Acid Content in a Novel LPA Rice Mutant, PLM11

Prem Chand Gyani, Haritha Bollinedi, Subbaiyan Gopala Krishnan, Kunnummal Kurungara Vinod, Archana Sachdeva, Prolay Kumar Bhowmick, Ranjith Kumar Ellur, Mariappan Nagarajan and Ashok Kumar Singh\*

\* Correspondence: aks\_gene@yahoo.com

**Supplementary Table S1.** List of polymorphic markers, their physical position and chromosome number

| S.No. | Marker Name | Chromosome | Position |
|-------|-------------|------------|----------|
| 1     | RM220       | 1          | 4.42     |
| 2     | RM1359      | 1          | 7.9      |
| 3     | RM493       | 1          | 12.26    |
| 4     | RM7075      | 1          | 15.11    |
| 5     | RM11009     | 1          | 18.01    |
| 6     | RM10843     | 1          | 13.79    |
| 7     | RM9         | 1          | 23.32    |
| 8     | RM1152      | 1          | 30.09    |
| 9     | RM3825      | 1          | 36.4     |
| 10    | RM6840      | 1          | 43.17    |
| 11    | Hv2-01      | 2          | 0.124    |
| 12    | RM110       | 2          | 1.33     |
| 13    | Hv2-10      | 2          | 4.29     |
| 14    | Hv2-68      | 2          | 26.1     |
| 15    | RM6         | 2          | 29.57    |
| 16    | RM166       | 2          | 34.35    |
| 17    | RM138       | 2          | 35.68    |
| 18    | RM5699      | 2          | 8.98     |
| 19    | RM13263     | 2          | 18.09    |
| 20    | Hv2-36      | 2          | 11.67    |
| 21    | Hv3-93      | 3          | 34.55    |
| 22    | RM22        | 3          | 1.52     |
| 23    | Hv3-12      | 3          | 4.92     |
| 24    | OSR13       | 3          | 7.12     |
| 25    | RM186       | 3          | 28.8     |
| 26    | RM71        | 3          | 8.76     |
| 27    | RM16533     | 4          | 8.63     |
| 28    | RM16294     | 4          | 0.92     |
| 29    | RM551       | 4          | 0.17     |
| 30    | RM518       | 4          | 2.03     |
| 31    | RM3471      | 4          | 6.31     |
| 32    | Hv4-21      | 4          | 15.57    |
| 33    | RM3367      | 4          | 24.09    |

| <b>S.No.</b> | <b>Marker Name</b> | <b>Chromosome</b> | <b>Position</b> |
|--------------|--------------------|-------------------|-----------------|
| 34           | RM470              | 4                 | 28.09           |
| 35           | RM3276             | 4                 | 30.68           |
| 36           | RM1153             | 4                 | 32.84           |
| 37           | RM3381             | 5                 | 9.58            |
| 38           | RM18371            | 5                 | 14.23           |
| 39           | Hv5-25             | 5                 | 9.12            |
| 40           | RM440              | 5                 | 19.91           |
| 41           | RM3476             | 5                 | 23.91           |
| 42           | Hv5-64             | 5                 | 27.77           |
| 43           | RM19291            | 6                 | 1.21            |
| 44           | RM204              | 6                 | 3.16            |
| 45           | RGNMS2220          | 6                 | 30.98           |
| 46           | RM528              | 6                 | 26.17           |
| 47           | RM2180             | 6                 | 7.28            |
| 48           | RM162              | 6                 | 24.04           |
| 49           | RM1261             | 6                 | 17.57           |
| 50           | RM7                | 7                 | 9.83            |
| 51           | RM5436             | 7                 | 9.08            |
| 52           | RM2                | 7                 | 16.02           |
| 53           | RM432              | 7                 | 18.03           |
| 54           | RM1132             | 7                 | 23.98           |
| 55           | RM47               | 7                 | 25.81           |
| 56           | RM22825            | 8                 | 11.75           |
| 57           | RM404              | 8                 | 15.43           |
| 58           | RM22807            | 8                 | 10.79           |
| 59           | RM25               | 8                 | 4.38            |
| 60           | RM22832            | 8                 | 11.61           |
| 61           | RM5637             | 8                 | 21.23           |
| 62           | RM5688             | 9                 | 1.71            |
| 63           | RM444              | 9                 | 5.92            |
| 64           | RM7364             | 9                 | 9.56            |
| 65           | Hv9-25             | 9                 | 14.74           |
| 66           | RM257              | 9                 | 17.71           |
| 67           | RM278              | 9                 | 23.01           |
| 68           | RM6100             | 10                | 10.89           |
| 69           | RM474              | 10                | 1.81            |
| 70           | RM467              | 10                | 13.48           |
| 71           | RGNMS3297          | 10                | 16.25           |
| 72           | RM286              | 11                | 0.38            |
| 73           | RM1812             | 11                | 2.41            |
| 74           | RM7226             | 11                | 14.51           |
| 75           | RM26918            | 11                | 20.13           |
| 76           | RM1227             | 12                | 27.38           |
| 77           | RM247              | 12                | 3.19            |
| 78           | RM519              | 12                | 19.9            |

**Supplementary Table S2.** Comprehensive list of annotated genes identified within the *qLPA8.1* QTL region.

| S. No. | Locus ID     | Position |         | Functions                                                         |
|--------|--------------|----------|---------|-------------------------------------------------------------------|
|        |              | Start    | End     |                                                                   |
| 1      | Os08g0175800 | 4419215  | 4419262 | Non-protein coding transcript                                     |
| 2      | Os08g0178000 | 4566329  | 4566665 | Non-protein coding transcript                                     |
| 3      | Os08g0178400 | 4592000  | 4592583 | Non-protein coding transcript                                     |
| 4      | Os08g0178650 | 4597056  | 4597381 | Protein unknown function; wound-induced domain containing protein |
| 5      | Os08g0180950 | 4718736  | 4718969 | Hypothetical conserved gene                                       |
| 6      | Os08g0181925 | 4779112  | 4779498 | Conserved hypothetical protein                                    |
| 7      | Os08g0184700 | 4968125  | 4968451 | Conserved hypothetical protein                                    |
| 8      | Os08g0187600 | 5114107  | 5114622 | Non-protein coding transcript                                     |
| 9      | Os08g0188151 | 5165230  | 5165766 | Hypothetical gene                                                 |
| 10     | Os08g0192001 | 5385370  | 5385976 | Non-protein coding transcript                                     |
| 11     | Os08g0192300 | 5400009  | 5400263 | Conserved hypothetical protein                                    |
| 12     | Os08g0199200 | 5735464  | 5735969 | Conserved hypothetical protein                                    |
| 13     | Os08g0201600 | 5893368  | 5893829 | Non-protein coding transcript                                     |
| 14     | Os08g0202500 | 5970251  | 5970875 | Conserved hypothetical protein                                    |
| 15     | Os08g0203201 | 5988432  | 5988931 | Similar to SHR5-receptor-like kinase (Fragment)                   |
| 16     | Os08g0203325 | 6004271  | 6004772 | Non-protein coding transcript                                     |
| 17     | Os08g0203501 | 6022081  | 6022579 | Non-protein coding transcript                                     |
| 18     | Os08g0203750 | 6047428  | 6047963 | Non-protein coding transcript                                     |
| 19     | Os08g0208300 | 6319060  | 6319437 | Conserved hypothetical protein                                    |
| 20     | Os08g0211025 | 6527009  | 6527269 | Hypothetical gene                                                 |
| 21     | Os08g0215900 | 6792260  | 6792917 | Hypothetical gene                                                 |
| 22     | Os08g0216450 | 6852674  | 6852927 | Conserved hypothetical protein                                    |
| 23     | Os08g0223799 | 7495525  | 7495588 | Non-protein coding transcript                                     |
| 24     | Os08g0226666 | 7734190  | 7734875 | Non-protein coding transcript                                     |
| 25     | Os08g0227500 | 7778740  | 7778955 | Similar to speckle-type POZ protein                               |
| 26     | Os08g0233000 | 8070577  | 8070804 | Non-protein coding transcript                                     |
| 27     | Os08g0235183 | 8207064  | 8207447 | Similar to Thaumatin-like protein                                 |
| 28     | Os08g0235550 | 8224155  | 8224982 | Conserved hypothetical protein                                    |
| 29     | Os08g0246700 | 8966304  | 8966798 | Hypothetical gene                                                 |
| 30     | Os08g0249200 | 9111086  | 9111844 | Similar to GDU1                                                   |
| 31     | Os08g0249600 | 9134106  | 9134700 | Diacylglycerol kinase 6                                           |
| 32     | Os08g0250300 | 9181114  | 9181517 | Similar to predicted protein                                      |
| 33     | Os08g0251000 | 9232201  | 9232818 | Non-protein coding transcript                                     |
| 34     | Os08g0252050 | 9327023  | 9327309 | Non-protein coding transcript                                     |
| 35     | Os08g0256100 | 9510326  | 9510824 | Similar to OSIGBa0157K09-H0214G12.13                              |

| S. No. | Locus ID     | Position |          | Functions                                                                      |
|--------|--------------|----------|----------|--------------------------------------------------------------------------------|
|        |              | Start    | End      |                                                                                |
| 36     | Os08g0258600 | 9646326  | 9646835  | Hypothetical gene                                                              |
| 37     | Os08g0260200 | 9773361  | 9773595  | Non-protein coding transcript                                                  |
| 38     | Os08g0269500 | 10287058 | 10287839 | Conserved hypothetical protein                                                 |
| 39     | Os08g0271600 | 10425433 | 10425813 | Conserved hypothetical protein                                                 |
| 40     | Os08g0273783 | 10538061 | 10538823 | Similar to Zinc finger, C2H2 type family protein, expressed                    |
| 41     | Os08g0274150 | 10567310 | 10567726 | Hypothetical gene                                                              |
| 42     | Os08g0274775 | 10569519 | 10569899 | Similar to phosphatidylinositol 3-and 4-kinase family protein                  |
| 43     | Os08g0280150 | 10906307 | 10906908 | Conserved hypothetical protein                                                 |
| 44     | Os08g0280501 | 10962154 | 10962711 | Non-protein coding transcript                                                  |
| 45     | Os08g0282700 | 11142234 | 11142856 | Hypothetical gene                                                              |
| 46     | Os08g0289266 | 11510586 | 11510921 | Similar to Histone H2A                                                         |
| 47     | Os08g0175200 | 4385769  | 4388881  | Protein unknown function                                                       |
| 48     | Os08g0175450 | 4400972  | 4401019  | Non-protein coding transcript                                                  |
| 49     | Os08g0175600 | 4411430  | 4417245  | Similar to PolI-like DNA polymerase                                            |
| 50     | Os08g0175700 | 4413202  | 4414401  | Hypothetical protein                                                           |
| 51     | Os08g0176100 | 4430918  | 4434203  | DNA/pantothenate metabolism flavoprotein C -terminal domain containing protein |
| 52     | Os08g0176200 | 4445655  | 4447532  | Serine/threonine protein kinase-related domain containing protein              |
| 53     | Os08g0176900 | 4505745  | 4508226  | Similar to Transcription factor HBP-1b(C38) (Fragment)                         |
| 54     | Os08g0177000 | 4505997  | 4507323  | Hypothetical protein                                                           |
| 55     | Os08g0177500 | 4546935  | 4549380  | Conserved hypothetical protein                                                 |
| 56     | Os08g0177550 | 4550913  | 4557184  | Conserved hypothetical protein                                                 |
| 57     | Os08g0177600 | 4552111  | 4556216  | Similar to double-strand break repair protein MRE11                            |
| 58     | Os08g0177700 | 4562440  | 4565329  | Similar to LSM7-like                                                           |
| 59     | Os08g0177800 | 4566815  | 4569933  | Similar to RNase H domain-containing protein                                   |
| 60     | Os08g0178200 | 4581432  | 4583489  | Similar to Monosaccharide transporter 3                                        |
| 61     | Os08g0178500 | 4593671  | 4594173  | Similar to H0315F07.12 protein                                                 |
| 62     | Os08g0178600 | 4595778  | 4597522  | Hypothetical gene                                                              |
| 63     | Os08g0178800 | 4610545  | 4612918  | Hypothetical conserved gene                                                    |
| 64     | Os08g0179000 | 4630538  | 4638873  | Protein kinase, catalytic domain domain containing protein                     |
| 65     | Os08g0179100 | 4635580  | 4638628  | Hypothetical protein                                                           |
| 66     | Os08g0179150 | 4635505  | 4636456  | Hypothetical conserved gene                                                    |
| 67     | Os08g0179400 | 4645325  | 4648753  | Hypothetical conserved gene                                                    |
| 68     | Os08g0179900 | 4672775  | 4675317  | Uncharacterised conserved protein UCP012943 domain containing protein          |
| 69     | Os08g0180100 | 4692655  | 4696632  | Similar to SET domain-containing protein.                                      |
| 70     | Os08g0180300 | 4700668  | 4708354  | DEAD-like helicase, N-terminal domain containing protein                       |
| 71     | Os08g0180500 | 4713705  | 4717694  | Zinc finger, BED-type predicted domain containing protein                      |

| S. No. | Locus ID     | Position |         | Functions                                                      |
|--------|--------------|----------|---------|----------------------------------------------------------------|
|        |              | Start    | End     |                                                                |
| 72     | Os08g0181750 | 4774914  | 4777902 | Conserved hypothetical protein                                 |
| 73     | Os08g0184600 | 4966415  | 4969131 | Conserved hypothetical protein                                 |
| 74     | Os08g0184800 | 4971046  | 4973826 | Conserved hypothetical protein                                 |
| 75     | Os08g0185701 | 5027574  | 5029922 | Non-protein coding transcript                                  |
| 76     | Os08g0185900 | 5034835  | 5035725 | Conserved hypothetical protein                                 |
| 77     | Os08g0186200 | 5046733  | 5048608 | Hypothetical conserved gene                                    |
| 78     | Os08g0187900 | 5145659  | 5146534 | Ubiquitin-conjugating enzyme, E2 domain containing protein.    |
| 79     | Os08g0188900 | 5186875  | 5187698 | Germin-like protein 8-1, Disease resistance                    |
| 80     | Os08g0189100 | 5208410  | 5209440 | Germin-like protein 8-3, Disease resistance                    |
| 81     | Os08g0189200 | 5222230  | 5223304 | Germin-like protein 8-3, Disease resistance                    |
| 82     | Os08g0189300 | 5228827  | 5229949 | Germin-like protein 8-4, Disease resistance                    |
| 83     | Os08g0189400 | 5233864  | 5234719 | Germin-like protein 8-5, Disease resistance                    |
| 84     | Os08g0189600 | 5242497  | 5243656 | Germin-like protein 8-7, Disease resistance                    |
| 85     | Os08g0189700 | 5248666  | 5249832 | Germin-like protein 8-8, Disease resistance                    |
| 86     | Os08g0189850 | 5254364  | 5255230 | Germin-like protein 8-9, Disease resistance                    |
| 87     | Os08g0189900 | 5260239  | 5261296 | Germin-like protein 8-10, Disease resistance                   |
| 88     | Os08g0190100 | 5264245  | 5265340 | Germin-like protein 8-11, Disease resistance                   |
| 89     | Os08g0190250 | 5274603  | 5277357 | Hypothetical gene                                              |
| 90     | Os08g0190300 | 5274970  | 5279294 | Disease resistance protein domain containing protein           |
| 91     | Os08g0190500 | 5314677  | 5315177 | Conserved hypothetical protein                                 |
| 92     | Os08g0190700 | 5315463  | 5317814 | Conserved hypothetical protein                                 |
| 93     | Os08g0191000 | 5322769  | 5325114 | Auxin efflux carrier domain containing protein                 |
| 94     | Os08g0191100 | 5327664  | 5328165 | Similar to Iron-responsive element binding protein (Fragment)  |
| 95     | Os08g0191150 | 5328907  | 5329776 | Non-protein coding transcript                                  |
| 96     | Os08g0191200 | 5341449  | 5345391 | VIRESCENT-ALBINO LEAF 1, glycinamide ribonucleotide synthetase |
| 97     | Os08g0191250 | 5344641  | 5345170 | Hypothetical gene                                              |
| 98     | Os08g0191300 | 5345885  | 5346658 | Conserved hypothetical protein                                 |
| 99     | Os08g0191466 | 5361078  | 5362944 | Hypothetical gene                                              |
| 100    | Os08g0191600 | 5364394  | 5366465 | Core autophagy gene, Nitrogen use efficiency and yield         |
| 101    | Os08g0191650 | 5371810  | 5375320 | Hypothetical gene                                              |
| 102    | Os08g0191700 | 5373362  | 5377125 | GLYOXALASE I-11, glyoxalase I-11                               |
| 103    | Os08g0191800 | 5380261  | 5383885 | Similar to Tyrosyl-tRNA synthetase                             |
| 104    | Os08g0191900 | 5384447  | 5388799 | Pentatricopeptide repeat domain containing protein             |
| 105    | Os08g0192100 | 5391860  | 5392486 | Hypothetical conserved gene                                    |
| 106    | Os08g0192200 | 5395517  | 5397475 | Conserved hypothetical protein                                 |
| 107    | Os08g0192400 | 5401162  | 5404366 | Similar to DRP1 protein                                        |

| S. No. | Locus ID     | Position |         | Functions                                                          |
|--------|--------------|----------|---------|--------------------------------------------------------------------|
|        |              | Start    | End     |                                                                    |
| 108    | Os08g0192900 | 5422274  | 5426674 | Nucleotide-binding, alpha-beta plait domain containing protein     |
| 109    | Os08g0192950 | 5422644  | 5425791 | Hypothetical protein                                               |
| 110    | Os08g0193000 | 5432554  | 5434185 | Conserved hypothetical protein                                     |
| 111    | Os08g0193100 | 5435576  | 5439963 | Polyprenyl synthetase-related domain containing protein            |
| 112    | Os08g0193200 | 5441457  | 5442964 | Hypothetical conserved gene                                        |
| 113    | Os08g0193300 | 5446749  | 5448654 | Hypothetical conserved gene                                        |
| 114    | Os08g0193500 | 5452058  | 5453811 | Hypothetical conserved gene                                        |
| 115    | Os08g0193700 | 5466374  | 5469315 | Similar to NBS-LRR disease resistance protein homologue (Fragment) |
| 116    | Os08g0193900 | 5474996  | 5477814 | Cyclin-like F-box domain containing protein                        |
| 117    | Os08g0194350 | 5517737  | 5519259 | F-box domain, Skp2-like domain containing protein                  |
| 118    | Os08g0194501 | 5532402  | 5536072 | Conserved hypothetical protein                                     |
| 119    | Os08g0194850 | 5543795  | 5545447 | Hypothetical protein                                               |
| 120    | Os08g0194900 | 5543765  | 5545891 | Hypothetical conserved gene                                        |
| 121    | Os08g0195000 | 5551365  | 5553193 | F-box domain, Skp2-like domain containing protein                  |
| 122    | Os08g0195400 | 5563255  | 5564422 | Protein of unknown function DUF3778 domain containing protein      |
| 123    | Os08g0195800 | 5572031  | 5574384 | Cyclin-like F-box domain containing protein                        |
| 124    | Os08g0195900 | 5576467  | 5578655 | F-box domain, cyclin-like domain containing protein                |
| 125    | Os08g0196200 | 5584231  | 5587025 | Hypothetical conserved gene                                        |
| 126    | Os08g0196900 | 5602622  | 5607315 | Hypothetical conserved gene                                        |
| 127    | Os08g0197025 | 5613322  | 5616590 | Hypothetical gene                                                  |
| 128    | Os08g0197050 | 5613578  | 5616235 | Hypothetical conserved gene                                        |
| 129    | Os08g0197200 | 5623663  | 5626623 | Conserved hypothetical protein                                     |
| 130    | Os08g0197400 | 5633346  | 5636220 | F-box domain, cyclin-like domain containing protein                |
| 131    | Os08g0197700 | 5645714  | 5648057 | Similar to Luminal binding protein 5 precursor (BiP 5)             |
| 132    | Os08g0197800 | 5652681  | 5655649 | Conserved hypothetical protein                                     |
| 133    | Os08g0197900 | 5658727  | 5659464 | Conserved hypothetical protein                                     |
| 134    | Os08g0198000 | 5663578  | 5664043 | HAT dimerisation domain containing protein                         |
| 135    | Os08g0198100 | 5672471  | 5676449 | Zinc finger, BED-type predicted domain containing protein          |
| 136    | Os08g0198200 | 5677979  | 5679084 | Hypothetical conserved gene                                        |
| 137    | Os08g0198300 | 5681460  | 5683088 | Similar to speckle-type POZ protein                                |
| 138    | Os08g0198700 | 5691120  | 5697423 | Similar to Glycolate oxidase (EC 1.1.3.15) (Fragment)              |
| 139    | Os08g0198800 | 5706417  | 5709046 | Conserved hypothetical protein                                     |
| 140    | Os08g0198900 | 5713945  | 5719160 | Conserved hypothetical protein                                     |
| 141    | Os08g0199000 | 5720470  | 5723936 | F-box domain, cyclin-like domain containing protein                |
| 142    | Os08g0199100 | 5728025  | 5729681 | F-box domain, cyclin-like domain containing protein                |
| 143    | Os08g0199400 | 5751863  | 5753741 | Similar to Stearoyl-acyl carrier protein desaturase                |

| S. No. | Locus ID     | Position |         | Functions                                                                          |
|--------|--------------|----------|---------|------------------------------------------------------------------------------------|
|        |              | Start    | End     |                                                                                    |
| 144    | Os08g0199525 | 5752141  | 5753244 | ADP-glucose pyrophosphorylase, conserved site domain containing protein            |
| 145    | Os08g0199775 | 5767787  | 5768582 | Hypothetical gene                                                                  |
| 146    | Os08g0200100 | 5787597  | 5789135 | Ribonucleotide reductase-related domain containing protein                         |
| 147    | Os08g0200300 | 5806463  | 5808326 | Similar to Photosystem II 10 kDa polypeptide (Fragment)                            |
| 148    | Os08g0200400 | 5811115  | 5816028 | K Homology domain containing protein                                               |
| 149    | Os08g0200500 | 5840300  | 5843516 | Serine/threonine protein kinase domain containing protein                          |
| 150    | Os08g0201100 | 5864931  | 5865851 | Conserved hypothetical protein                                                     |
| 151    | Os08g0201500 | 5878083  | 5879812 | Similar to SHR5-receptor-like kinase (Fragment)                                    |
| 152    | Os08g0201700 | 5893697  | 5894289 | Protein kinase-like domain domain containing protein                               |
| 153    | Os08g0202200 | 5938279  | 5939791 | Conserved hypothetical protein                                                     |
| 154    | Os08g0202350 | 5958903  | 5959364 | Non-protein coding transcript                                                      |
| 155    | Os08g0202400 | 5964506  | 5968143 | Disease resistance protein domain containing protein                               |
| 156    | Os08g0203100 | 5982519  | 5985990 | Hypothetical conserved gene                                                        |
| 157    | Os08g0203150 | 5987781  | 5988339 | Hypothetical gene                                                                  |
| 158    | Os08g0203350 | 6006493  | 6007052 | Conserved hypothetical protein                                                     |
| 159    | Os08g0203600 | 6032208  | 6039069 | Hypothetical conserved gene                                                        |
| 160    | Os08g0203650 | 6037884  | 6038369 | Non-protein coding transcript                                                      |
| 161    | Os08g0203700 | 6040528  | 6048561 | Protein kinase, core domain containing protein                                     |
| 162    | Os08g0203800 | 6055827  | 6058993 | Cyclin-like F-box domain containing protein                                        |
| 163    | Os08g0203900 | 6062772  | 6065354 | UAA transporter family protein                                                     |
| 164    | Os08g0204632 | 6102975  | 6105362 | Conserved hypothetical protein                                                     |
| 165    | Os08g0204800 | 6112375  | 6115612 | Conserved hypothetical protein                                                     |
| 166    | Os08g0205000 | 6121845  | 6123652 | Transferase domain containing protein                                              |
| 167    | Os08g0205200 | 6142162  | 6143084 | Delayed-early response protein/equilibrative nucleoside transporter family protein |
| 168    | Os08g0205300 | 6155162  | 6157777 | Hypothetical conserved gene                                                        |
| 169    | Os08g0205500 | 6161997  | 6163054 | Heavy metal-associated domain, HMA domain containing protein                       |
| 170    | Os08g0205650 | 6162026  | 6163058 | Hypothetical protein                                                               |
| 171    | Os08g0205800 | 6168352  | 6169288 | Hypothetical conserved gene                                                        |
| 172    | Os08g0205900 | 6170105  | 6175794 | Similar to Viroid RNA-binding protein (Fragment)                                   |
| 173    | Os08g0206466 | 6210108  | 6211145 | Hypothetical gene                                                                  |
| 174    | Os08g0206500 | 6212073  | 6217326 | Similar to HAP5 subunit of HAP complex                                             |
| 175    | Os08g0206800 | 6233507  | 6234131 | Similar to cDNA clone:001-034-C01, full insert sequence                            |
| 176    | Os08g0206950 | 6242130  | 6243735 | Similar to Pectinesterase                                                          |
| 177    | Os08g0207000 | 6244128  | 6245111 | Similar to 40S ribosomal protein S11                                               |
| 178    | Os08g0207300 | 6251353  | 6252206 | Conserved hypothetical protein                                                     |
| 179    | Os08g0207800 | 6281221  | 6286663 | Peptidase aspartic, catalytic domain containing protein                            |

| S. No. | Locus ID     | Position |         | Functions                                                                                         |
|--------|--------------|----------|---------|---------------------------------------------------------------------------------------------------|
|        |              | Start    | End     |                                                                                                   |
| 180    | Os08g0207951 | 6303848  | 6304320 | Hypothetical protein                                                                              |
| 181    | Os08g0208200 | 6313873  | 6314560 | Peptidase aspartic, catalytic domain containing protein                                           |
| 182    | Os08g0208700 | 6334289  | 6339617 | Zinc finger, BED-type predicted domain containing protein                                         |
| 183    | Os08g0209000 | 6358448  | 6359451 | Conserved hypothetical protein                                                                    |
| 184    | Os08g0210300 | 6432276  | 6434158 | Similar to H0502G05.7 protein                                                                     |
| 185    | Os08g0213200 | 6585028  | 6586115 | Hypothetical conserved gene                                                                       |
| 186    | Os08g0213816 | 6616927  | 6617180 | Conserved hypothetical protein                                                                    |
| 187    | Os08g0214233 | 6626915  | 6627830 | Conserved hypothetical protein                                                                    |
| 188    | Os08g0214300 | 6670593  | 6671933 | Hypothetical conserved gene                                                                       |
| 189    | Os08g0214600 | 6712297  | 6713348 | Conserved hypothetical protein                                                                    |
| 190    | Os08g0215300 | 6734412  | 6739686 | Conserved hypothetical protein                                                                    |
| 191    | Os08g0216000 | 6745946  | 6747840 | Hypothetical conserved gene                                                                       |
| 192    | Os08g0216050 | 6827896  | 6829236 | Hypothetical conserved gene                                                                       |
| 193    | Os08g0216300 | 6842089  | 6843002 | Conserved hypothetical protein                                                                    |
| 194    | Os08g0216900 | 6891099  | 6893671 | Conserved hypothetical protein                                                                    |
| 195    | Os08g0217050 | 6942146  | 6948943 | Similar to H0124E07.9 protein                                                                     |
| 196    | Os08g0217800 | 7085914  | 7086571 | Hypothetical protein                                                                              |
| 197    | Os08g0218700 | 7165471  | 7166548 | Conserved hypothetical protein                                                                    |
| 198    | Os08g0219100 | 7203560  | 7205848 | Similar to cDNA clone:J023038L08, full insert sequence                                            |
| 199    | Os08g0220400 | 7325157  | 7327754 | Pectin lyase fold/virulence factor domain containing protein.                                     |
| 200    | Os08g0220500 | 7325507  | 7326193 | Hypothetical protein                                                                              |
| 201    | Os08g0221300 | 7363845  | 7367943 | Conserved hypothetical protein                                                                    |
| 202    | Os08g0222100 | 7410180  | 7411388 | Conserved hypothetical protein                                                                    |
| 203    | Os08g0222800 | 7451363  | 7452016 | Similar to cDNA clone:J023038L08, full insert sequence                                            |
| 204    | Os08g0223900 | 7540127  | 7547972 | Bicyclic triterpene poaceatapelol synthase, Pollen coat formation                                 |
| 205    | Os08g0224100 | 7553773  | 7558719 | Similar to Serine/threonine protein kinase-like protein                                           |
| 206    | Os08g0224150 | 7554714  | 7558408 | Hypothetical protein                                                                              |
| 207    | Os08g0224500 | 7583487  | 7588332 | Similar to 3-glucanase                                                                            |
| 208    | Os08g0224700 | 7591562  | 7596941 | Similar to 26S proteasome subunit RPN2a                                                           |
| 209    | Os08g0224901 | 7607234  | 7609254 | Non-protein coding transcript                                                                     |
| 210    | Os08g0225000 | 7612317  | 7614842 | $\beta$ -hydroxyacyl-ACP dehydratase, Regulation of fatty acid synthesis, Chloroplast development |
| 211    | Os08g0225700 | 7686865  | 7687583 | Hypothetical conserved gene                                                                       |
| 212    | Os08g0225900 | 7691858  | 7693642 | Hypothetical conserved gene                                                                       |
| 213    | Os08g0226000 | 7693777  | 7694865 | Similar to speckle-type POZ protein                                                               |
| 214    | Os08g0226100 | 7698342  | 7699299 | Hypothetical conserved gene                                                                       |
| 215    | Os08g0226166 | 7710739  | 7711320 | Similar to Cytochrome P450 CYP76H18                                                               |
| 216    | Os08g0226232 | 7711067  | 7716513 | Hypothetical protein                                                                              |



| S. No. | Locus ID     | Position |         | Functions                                                      |
|--------|--------------|----------|---------|----------------------------------------------------------------|
|        |              | Start    | End     |                                                                |
| 217    | Os08g0226300 | 7714178  | 7716625 | Similar to Cytochrome P450 family protein                      |
| 218    | Os08g0226400 | 7717968  | 7719211 | Hypothetical conserved gene                                    |
| 219    | Os08g0226600 | 7730270  | 7733632 | Hypothetical gene                                              |
| 220    | Os08g0226800 | 7740247  | 7741464 | Similar to speckle-type POZ protein                            |
| 221    | Os08g0227100 | 7756668  | 7758169 | Kelch related domain containing protein                        |
| 222    | Os08g0227200 | 7760699  | 7762222 | Kelch related domain containing protein                        |
| 223    | Os08g0227400 | 7777850  | 7778536 | Similar to speckle-type POZ protein                            |
| 224    | Os08g0227900 | 7803012  | 7807496 | Hypothetical conserved gene                                    |
| 225    | Os08g0228100 | 7820316  | 7821765 | Non-protein coding transcript                                  |
| 226    | Os08g0228200 | 7834796  | 7836523 | BTB/POZ-like domain containing protein                         |
| 227    | Os08g0229200 | 7882502  | 7883098 | Non-protein coding transcript                                  |
| 228    | Os08g0229500 | 7892281  | 7893913 | Hypothetical protein                                           |
| 229    | Os08g0229601 | 7892344  | 7894459 | Hypothetical conserved gene                                    |
| 230    | Os08g0230000 | 7911799  | 7916363 | Conserved hypothetical protein                                 |
| 231    | Os08g0230500 | 7964016  | 7968546 | Protein of unknown function DUF537 family protein              |
| 232    | Os08g0230600 | 7972782  | 7973478 | LIM, zinc-binding domain containing protein                    |
| 233    | Os08g0230800 | 7982512  | 7985309 | Hypothetical conserved gene                                    |
| 234    | Os08g0230900 | 7988597  | 7989786 | Similar to Subtilisin protease (Fragment)                      |
| 235    | Os08g0231100 | 7991097  | 7993729 | Hypothetical protein                                           |
| 236    | Os08g0231400 | 7994404  | 7995717 | Germin-like protein 8-12, Disease resistance                   |
| 237    | Os08g0232000 | 8011977  | 8014326 | Similar to Glucose-6-phosphate isomerase                       |
| 238    | Os08g0232700 | 8061317  | 8063491 | Exo70 exocyst complex subunit family protein                   |
| 239    | Os08g0233300 | 8104943  | 8107543 | Similar to cDNA clone:J013061K19, full insert sequence         |
| 240    | Os08g0233900 | 8147380  | 8148509 | Conserved hypothetical protein                                 |
| 241    | Os08g0234000 | 8153389  | 8155815 | Similar to 60S ribosomal protein L7-2                          |
| 242    | Os08g0234050 | 8154564  | 8155536 | Conserved hypothetical protein                                 |
| 243    | Os08g0234100 | 8156590  | 8158428 | Conserved hypothetical protein                                 |
| 244    | Os08g0234400 | 8165310  | 8168702 | Hypothetical gene                                              |
| 245    | Os08g0234700 | 8175612  | 8177396 | Conserved hypothetical protein                                 |
| 246    | Os08g0235400 | 8216495  | 8219321 | Conserved hypothetical protein                                 |
| 247    | Os08g0235600 | 8230111  | 8235214 | Hypothetical conserved gene                                    |
| 248    | Os08g0235651 | 8235249  | 8236739 | NB-ARC domain containing protein                               |
| 249    | Os08g0235800 | 8258523  | 8259611 | Similar to WRKY transcription factor 25                        |
| 250    | Os08g0236400 | 8283843  | 8285334 | Epidermal growth factor-like, type 3 domain containing protein |
| 251    | Os08g0236700 | 8298118  | 8299493 | Similar to Exonuclease                                         |
| 252    | Os08g0236800 | 8300327  | 8302290 | Conserved hypothetical protein                                 |
| 253    | Os08g0236866 | 8303870  | 8307351 | Hypothetical conserved gene                                    |

| S. No. | Locus ID     | Position |         | Functions                                                          |
|--------|--------------|----------|---------|--------------------------------------------------------------------|
|        |              | Start    | End     |                                                                    |
| 254    | Os08g0237000 | 8328017  | 8329241 | Xyloglucan endotransglycosylase/hydrolase protein 8 precursor      |
| 255    | Os08g0237100 | 8335699  | 8339610 | Conserved hypothetical protein                                     |
| 256    | Os08g0237200 | 8342253  | 8346555 | Mannose-1-phosphate guanyltransferase                              |
| 257    | Os08g0237500 | 8342408  | 8344154 | Non-protein coding transcript                                      |
| 258    | Os08g0237800 | 8384563  | 8385805 | Similar to Xyloglucan endotransglycosylase (Fragment)              |
| 259    | Os08g0238100 | 8390973  | 8392828 | Similar to Pentatricopeptide repeat protein PPR986-12              |
| 260    | Os08g0238200 | 8394276  | 8397823 | Dienelactone hydrolase domain containing protein                   |
| 261    | Os08g0238700 | 8415405  | 8417869 | Conserved hypothetical protein                                     |
| 262    | Os08g0239000 | 8424284  | 8425290 | Complex 1 LYR protein family protein                               |
| 263    | Os08g0239900 | 8464913  | 8469555 | Similar to Flavonol 4-sulfotransferase                             |
| 264    | Os08g0240000 | 8472521  | 8475589 | Similar to STF-1 (Fragment)                                        |
| 265    | Os08g0240500 | 8488370  | 8489782 | Glycoside hydrolase, family 16 domain containing protein           |
| 266    | Os08g0240566 | 8494099  | 8495316 | Similar to OSIGBa0118P15.7 protein                                 |
| 267    | Os08g0240966 | 8527768  | 8528653 | Non-protein coding transcript                                      |
| 268    | Os08g0241300 | 8570830  | 8575238 | Similar to OSIGBa0118P15.3 protein                                 |
| 269    | Os08g0241400 | 8581992  | 8584058 | Similar to protein binding protein                                 |
| 270    | Os08g0241800 | 8613746  | 8615699 | Similar to Plasma membrane H <sup>+</sup> -ATPase                  |
| 271    | Os08g0241900 | 8615720  | 8617846 | Hypothetical protein                                               |
| 272    | Os08g0242900 | 8681628  | 8686438 | Afadin/alpha-actinin-binding domain containing protein             |
| 273    | Os08g0243001 | 8681711  | 8683505 | Non-protein coding transcript                                      |
| 274    | Os08g0243100 | 8703799  | 8708888 | 4'-phosphopantetheinyl transferase domain containing protein       |
| 275    | Os08g0243500 | 8760402  | 8765182 | Similar to NADPH-cytochrome P450 oxydoreductase isoform 2          |
| 276    | Os08g0243900 | 8795683  | 8797831 | Mu2 adaptin subunit (AP50) of AP2 domain containing protein        |
| 277    | Os08g0244100 | 8802820  | 8806880 | Syntaxin 6, N-terminal domain containing protein                   |
| 278    | Os08g0244400 | 8811775  | 8816699 | SET domain containing protein                                      |
| 279    | Os08g0244500 | 8837400  | 8839354 | Similar to hydrolase, hydrolyzing O-glycosyl compounds             |
| 280    | Os08g0244625 | 8838319  | 8839100 | Non-protein coding transcript                                      |
| 281    | Os08g0244750 | 8850008  | 8852859 | Conserved hypothetical protein                                     |
| 282    | Os08g0244800 | 8856335  | 8858424 | Non-protein coding transcript                                      |
| 283    | Os08g0245200 | 8874179  | 8878862 | 4-coumarate:coenzyme A ligase, Lignin biosynthesis                 |
| 284    | Os08g0245301 | 8874383  | 8878050 | Hypothetical gene                                                  |
| 285    | Os08g0246001 | 8915335  | 8917400 | Hypothetical gene                                                  |
| 286    | Os08g0246100 | 8922657  | 8926442 | Hypothetical conserved gene                                        |
| 287    | Os08g0246400 | 8955294  | 8959576 | Similar to Ubiquinol-cytochrome c reductase complex 14 kDa protein |
| 288    | Os08g0246500 | 8963793  | 8964481 | Similar to Mitochondrial GTPase                                    |

| S. No. | Locus ID     | Position |          | Functions                                                          |
|--------|--------------|----------|----------|--------------------------------------------------------------------|
|        |              | Start    | End      |                                                                    |
| 289    | Os08g0246550 | 8964090  | 8965199  | Hypothetical gene                                                  |
| 290    | Os08g0246950 | 8977536  | 8978715  | Hypothetical protein                                               |
| 291    | Os08g0247600 | 9001801  | 9005304  | Leucine-rich repeat, N-terminal domain containing protein          |
| 292    | Os08g0248000 | 9030748  | 9031356  | Similar to predicted protein                                       |
| 293    | Os08g0248400 | 9050060  | 9051612  | Pentatricopeptide repeat domain containing protein                 |
| 294    | Os08g0248800 | 9071719  | 9075883  | Similar to Aspartate carbamoyltransferase 3, chloroplast precursor |
| 295    | Os08g0248900 | 9081566  | 9086469  | Similar to ADP-ribosylation factor 3                               |
| 296    | Os08g0249000 | 9098485  | 9099878  | Zinc finger, B-box domain containing protein                       |
| 297    | Os08g0249100 | 9101238  | 9105746  | Serine/threonine protein kinase-related domain containing protein  |
| 298    | Os08g0249300 | 9123551  | 9126818  | Hypothetical protein                                               |
| 299    | Os08g0249400 | 9126454  | 9127450  | Hypothetical conserved gene                                        |
| 300    | Os08g0249675 | 9134388  | 9135396  | Hypothetical protein                                               |
| 301    | Os08g0249900 | 9165968  | 9167452  | Similar to Gibberellin 20 oxidase 2                                |
| 302    | Os08g0250100 | 9174654  | 9178792  | Hypothetical conserved gene                                        |
| 303    | Os08g0250900 | 9224375  | 9228110  | Homologue of the Arabidopsis thaliana Suppressor of MAX2-1         |
| 304    | Os08g0253800 | 9384129  | 9387669  | Similar to Cellulose synthase-like family C3 protein (Fragment)    |
| 305    | Os08g0254200 | 9395073  | 9397980  | Conserved hypothetical protein                                     |
| 306    | Os08g0254600 | 9411335  | 9416401  | Similar to cyclic nucleotide-gated ion channel 14                  |
| 307    | Os08g0254900 | 9424760  | 9428473  | Similar to Glutamyl-tRNA reductase binding protein                 |
| 308    | Os08g0255140 | 9440105  | 9441435  | Hypothetical gene                                                  |
| 309    | Os08g0256000 | 9507285  | 9508548  | Conserved hypothetical protein                                     |
| 310    | Os08g0256700 | 9538125  | 9539756  | Conserved hypothetical protein                                     |
| 311    | Os08g0256750 | 9545388  | 9548984  | Hypothetical gene                                                  |
| 312    | Os08g0259100 | 9692697  | 9697289  | Conserved hypothetical protein                                     |
| 313    | Os08g0260600 | 9784270  | 9786922  | Tetraspanin domain containing protein                              |
| 314    | Os08g0260800 | 9795807  | 9798597  | Similar to NB-ARC domain containing protein                        |
| 315    | Os08g0261000 | 9824627  | 9828471  | NB-ARC domain containing protein                                   |
| 316    | Os08g0261100 | 9831006  | 9834047  | Protein of unknown function DUF1218 family protein                 |
| 317    | Os08g0262500 | 9921522  | 9923218  | Cytochrome P450 family protein                                     |
| 318    | Os08g0263100 | 9964987  | 9965740  | Conserved hypothetical protein                                     |
| 319    | Os08g0263300 | 9976976  | 9979975  | Similar to cDNA clone:J013108L16, full insert sequence             |
| 320    | Os08g0263400 | 9984345  | 9985265  | Hypothetical protein                                               |
| 321    | Os08g0264700 | 10051525 | 10053112 | Hypothetical conserved gene                                        |
| 322    | Os08g0265000 | 10062034 | 10064824 | Hypothetical gene                                                  |
| 323    | Os08g0266200 | 10131802 | 10135064 | Similar to T24D18.25 protein                                       |
| 324    | Os08g0266225 | 10136783 | 10137582 | Conserved hypothetical protein                                     |

| S. No. | Locus ID     | Position |          | Functions                                                     |
|--------|--------------|----------|----------|---------------------------------------------------------------|
|        |              | Start    | End      |                                                               |
| 325    | Os08g0266400 | 10142326 | 10144699 | Leucine-rich repeat, N-terminal domain containing protein     |
| 326    | Os08g0266600 | 10152106 | 10156715 | WD40/YVTN repeat-like domain containing protein               |
| 327    | Os08g0266700 | 10160233 | 10165699 | Rad21/Rec8 like protein, C-terminal domain containing protein |
| 328    | Os08g0267300 | 10190139 | 10193202 | Peptidase A1 domain containing protein                        |
| 329    | Os08g0267425 | 10190145 | 10191481 | Non-protein coding transcript                                 |
| 330    | Os08g0268000 | 10221804 | 10222906 | Conserved hypothetical protein                                |
| 331    | Os08g0268550 | 10257621 | 10259312 | Conserved hypothetical protein                                |
| 332    | Os08g0268900 | 10265432 | 10268892 | Hypothetical conserved gene                                   |
| 333    | Os08g0269300 | 10284185 | 10285114 | Similar to H0311C03.5 protein                                 |
| 334    | Os08g0269600 | 10291954 | 10292821 | EGF-like region domain containing protein                     |
| 335    | Os08g0269700 | 10294239 | 10295050 | Conserved hypothetical protein                                |
| 336    | Os08g0270400 | 10355413 | 10358378 | Similar to Cinnamyl alcohol dehydrogenase                     |
| 337    | Os08g0270500 | 10360387 | 10364290 | Conserved hypothetical protein                                |
| 338    | Os08g0270800 | 10367168 | 10369143 | Conserved hypothetical protein                                |
| 339    | Os08g0270900 | 10372707 | 10373655 | Conserved hypothetical protein                                |
| 340    | Os08g0271400 | 10410093 | 10411679 | Hypothetical protein                                          |
| 341    | Os08g0272000 | 10444349 | 10446816 | Similar to GAG1At protein                                     |
| 342    | Os08g0272200 | 10453730 | 10456174 | Pentatricopeptide repeat domain containing protein            |
| 343    | Os08g0272800 | 10473629 | 10474373 | Hypothetical gene                                             |
| 344    | Os08g0273000 | 10491641 | 10494280 | Conserved hypothetical protein                                |
| 345    | Os08g0273600 | 10534399 | 10539928 | Non-protein coding transcript                                 |
| 346    | Os08g0275200 | 10590895 | 10592947 | Protein kinase, core domain containing protein                |
| 347    | Os08g0275600 | 10591039 | 10592636 | Hypothetical protein                                          |
| 348    | Os08g0276000 | 10621769 | 10625430 | Similar to Transmembrane 9 superfamily protein member 4       |
| 349    | Os08g0276100 | 10630309 | 10633641 | Similar to NDF1 (NDH-DEPENDENT CYCLIC ELECTRON FLOW 1)        |
| 350    | Os08g0276200 | 10637548 | 10639603 | Similar to WRKY transcription factor 44                       |
| 351    | Os08g0276400 | 10655519 | 10658544 | Serine/threonine protein kinase domain containing protein     |
| 352    | Os08g0277300 | 10723268 | 10726789 | Similar to Flavonol 4-sulfotransferase                        |
| 353    | Os08g0278501 | 10781685 | 10782141 | Hypothetical protein                                          |
| 354    | Os08g0278750 | 10804531 | 10805024 | Similar to nucleotidyltransferase family protein              |
| 355    | Os08g0278900 | 10810395 | 10813333 | MIR domain containing protein                                 |
| 356    | Os08g0280125 | 10900154 | 10903100 | Hypothetical protein                                          |
| 357    | Os08g0280600 | 10962195 | 10967484 | Reticulon domain containing protein                           |
| 358    | Os08g0281500 | 11030245 | 11031588 | DNA-binding pseudobarrel domain domain containing protein     |
| 359    | Os08g0281600 | 11035931 | 11037288 | F-box domain, cyclin-like domain containing protein           |
| 360    | Os08g0282100 | 11064461 | 11066098 | DNA-binding pseudobarrel domain domain containing protein     |

| S. No. | Locus ID     | Position |          | Functions                                                       |
|--------|--------------|----------|----------|-----------------------------------------------------------------|
|        |              | Start    | End      |                                                                 |
| 361    | Os08g0282200 | 11074545 | 11078779 | Hypothetical protein                                            |
| 362    | Os08g0282400 | 11102726 | 11108224 | Similar to Alpha-SNAP (Fragment)                                |
| 363    | Os08g0283000 | 11158562 | 11159207 | Similar to H0315A08.1 protein                                   |
| 364    | Os08g0283300 | 11170433 | 11171225 | Similar to H0315A08.1 protein                                   |
| 365    | Os08g0283600 | 11178543 | 11179368 | Similar to H0315A08.1 protein                                   |
| 366    | Os08g0283900 | 11201775 | 11202600 | Similar to H0315A08.1 protein                                   |
| 367    | Os08g0284500 | 11245647 | 11246472 | Similar to H0315A08.1 protein                                   |
| 368    | Os08g0285200 | 11263369 | 11266927 | WD40 repeat-like domain containing protein                      |
| 369    | Os08g0285301 | 11267321 | 11268866 | Conserved hypothetical protein                                  |
| 370    | Os08g0285350 | 11267744 | 11268082 | Hypothetical conserved gene                                     |
| 371    | Os08g0285600 | 11274674 | 11279209 | Similar to phyto-sulfokine receptor                             |
| 372    | Os08g0286100 | 11310539 | 11311944 | Similar to predicted protein                                    |
| 373    | Os08g0286500 | 11321679 | 11323563 | Hypothetical conserved gene                                     |
| 374    | Os08g0287200 | 11374384 | 11375591 | Hypothetical conserved gene                                     |
| 375    | Os08g0288000 | 11404746 | 11409808 | Conserved hypothetical protein                                  |
| 376    | Os08g0288400 | 11460357 | 11462712 | Similar to transmembrane 9 superfamily protein member 2         |
| 377    | Os08g0288500 | 11463136 | 11468530 | Similar to G-patch domain containing protein                    |
| 378    | Os08g0290200 | 11564027 | 11565163 | Protein of unknown function DUF313 domain containing protein    |
| 379    | Os08g0290400 | 11583484 | 11587229 | Conserved hypothetical protein                                  |
| 380    | Os08g0290700 | 11607393 | 11608814 | Winged helix repressor DNA-binding domain containing protein    |
| 381    | Os08g0176633 | 4468741  | 4472698  | Conserved hypothetical protein                                  |
| 382    | Os08g0177300 | 4523794  | 4538717  | HSA domain containing protein                                   |
| 383    | Os08g0178100 | 4571022  | 4580739  | Pep3/Vps18/deep orange domain containing protein                |
| 384    | Os08g0178300 | 4586478  | 4591217  | Protein of unknown function DUF2050                             |
| 385    | Os08g0178900 | 4617579  | 4620400  | Homeodomain-like domain containing protein                      |
| 386    | Os08g0180000 | 4676292  | 4680426  | mRNA capping enzyme, large subunit family protein               |
| 387    | Os08g0180400 | 4709755  | 4710209  | Similar to Kinesin-like protein                                 |
| 388    | Os08g0182400 | 4817967  | 4820693  | Conserved hypothetical protein                                  |
| 389    | Os08g0184300 | 4947263  | 4952151  | Hypothetical protein                                            |
| 390    | Os08g0187500 | 5109268  | 5116778  | Similar to Roc1                                                 |
| 391    | Os08g0187700 | 5119189  | 5128123  | ENTH/VHS domain containing protein                              |
| 392    | Os08g0187800 | 5139674  | 5143593  | Glucose 6-phosphate/phosphate translocator, Starch biosynthesis |
| 393    | Os08g0188000 | 5147424  | 5150332  | RNA-binding, CRM domain domain containing protein               |
| 394    | Os08g0189500 | 5238999  | 5240148  | Germin-like protein 8-6, Disease resistance                     |
| 395    | Os08g0190200 | 5268917  | 5273165  | Similar to cDNA clone:J033051E20, full insert sequence          |
| 396    | Os08g0190225 | 5269409  | 5272023  | Hypothetical protein                                            |

| S. No. | Locus ID     | Position |         | Functions                                                                                                        |
|--------|--------------|----------|---------|------------------------------------------------------------------------------------------------------------------|
|        |              | Start    | End     |                                                                                                                  |
| 397    | Os08g0190800 | 5318646  | 5320835 | Postsynaptic protein CRIPT                                                                                       |
| 398    | Os08g0190901 | 5318774  | 5320582 | Non-protein coding transcript                                                                                    |
| 399    | Os08g0191400 | 5349923  | 5350343 | Hypothetical gene                                                                                                |
| 400    | Os08g0191433 | 5352105  | 5363276 | Starch synthase, Starch biosynthesis                                                                             |
| 401    | Os08g0192800 | 5418272  | 5420390 | Bromodomain containing protein                                                                                   |
| 402    | Os08g0193600 | 5457347  | 5460486 | Hypothetical conserved gene                                                                                      |
| 403    | Os08g0194000 | 5479726  | 5481493 | F-box domain, Skp2-like domain containing protein                                                                |
| 404    | Os08g0195650 | 5569446  | 5570315 | Conserved hypothetical protein                                                                                   |
| 405    | Os08g0197000 | 5609250  | 5612337 | Cyclin-like F-box domain containing protein                                                                      |
| 406    | Os08g0197100 | 5618541  | 5621553 | Cyclin-like F-box domain containing protein                                                                      |
| 407    | Os08g0197300 | 5628896  | 5632250 | F-box domain, cyclin-like domain containing protein                                                              |
| 408    | Os08g0197500 | 5638269  | 5643201 | Cyclin-like F-box domain containing protein                                                                      |
| 409    | Os08g0197950 | 5659559  | 5661224 | Hypothetical conserved gene                                                                                      |
| 410    | Os08g0199300 | 5746738  | 5751829 | Similar to YyaF/YCHF TRANSFAC/OBG family small GTPase plus RNA binding domain TGS (Fragment)                     |
| 411    | Os08g0200600 | 5846866  | 5850647 | NAC transcription factor, Negative regulation of drought tolerance                                               |
| 412    | Os08g0200750 | 5846926  | 5850631 | Hypothetical protein                                                                                             |
| 413    | Os08g0202300 | 5942660  | 5960134 | Hypothetical conserved gene                                                                                      |
| 414    | Os08g0203400 | 6015745  | 6023225 | Protein kinase, core domain containing protein                                                                   |
| 415    | Os08g0205100 | 6127418  | 6131390 | Disease resistance protein domain containing protein                                                             |
| 416    | Os08g0205125 | 6127823  | 6131014 | Hypothetical protein                                                                                             |
| 417    | Os08g0205150 | 6137622  | 6141504 | CC-NBS-LRR protein, Cold stress signaling and response                                                           |
| 418    | Os08g0205175 | 6138088  | 6141373 | Hypothetical protein                                                                                             |
| 419    | Os08g0205400 | 6159123  | 6161383 | Cu chaperone, Root-to-shoot Cu translocation, Distribution of Cu from old leaves to developing tissues and seeds |
| 420    | Os08g0206400 | 6206039  | 6211417 | Similar to Potassium transporter 18                                                                              |
| 421    | Os08g0206600 | 6218688  | 6224037 | Similar to AICARFT/IMPCHase bienzyme family protein                                                              |
| 422    | Os08g0206650 | 6218749  | 6223799 | Hypothetical protein                                                                                             |
| 423    | Os08g0206700 | 6226356  | 6231302 | DNA-binding, integrase-type domain containing protein                                                            |
| 424    | Os08g0206900 | 6237449  | 6242078 | UDP-N-acetylglucosamine pyrophosphorylase 1, Regulation of leaf senescence, Defence responses                    |
| 425    | Os08g0207401 | 6267772  | 6270409 | Hypothetical gene                                                                                                |
| 426    | Os08g0207500 | 6267823  | 6270904 | Similar to Zinc transporter ZIP1 (Fragment)                                                                      |
| 427    | Os08g0207600 | 6272214  | 6280917 | Similar to GTP-binding protein                                                                                   |
| 428    | Os08g0208400 | 6319161  | 6324373 | Conserved hypothetical protein                                                                                   |
| 429    | Os08g0211750 | 6553984  | 6585906 | Conserved hypothetical protein                                                                                   |
| 430    | Os08g0214900 | 6719347  | 6720055 | Hypothetical conserved gene                                                                                      |
| 431    | Os08g0215200 | 6728264  | 6732694 | Conserved hypothetical protein                                                                                   |
| 432    | Os08g0215400 | 6736981  | 6742879 | Conserved hypothetical protein                                                                                   |

| S. No. | Locus ID     | Position |         | Functions                                                                                      |
|--------|--------------|----------|---------|------------------------------------------------------------------------------------------------|
|        |              | Start    | End     |                                                                                                |
| 433    | Os08g0216600 | 6866467  | 6870682 | Similar to cDNA clone:J013022L16, full insert sequence                                         |
| 434    | Os08g0220600 | 7339066  | 7348077 | Fibronectin, type III domain containing protein                                                |
| 435    | Os08g0223700 | 7488653  | 7492184 | EMB1135 (EMBRYO DEFECTIVE 1135)                                                                |
| 436    | Os08g0223833 | 7501641  | 7510161 | Similar to H0702G05.10 protein                                                                 |
| 437    | Os08g0224000 | 7545583  | 7551989 | NB-ARC domain containing protein                                                               |
| 438    | Os08g0224200 | 7559100  | 7563171 | Similar to H0702G05.3 protein                                                                  |
| 439    | Os08g0224250 | 7559814  | 7560619 | Non-protein coding transcript                                                                  |
| 440    | Os08g0224300 | 7568558  | 7573900 | Determination of the grain yield, Modulation of nitrogen utilization                           |
| 441    | Os08g0224800 | 7605599  | 7610209 | Hypothetical conserved gene                                                                    |
| 442    | Os08g0225050 | 7616789  | 7620327 | Hypothetical gene                                                                              |
| 443    | Os08g0225100 | 7616789  | 7620106 | Similar to predicted protein                                                                   |
| 444    | Os08g0225400 | 7652630  | 7664411 | Similar to OSIGBa0113I13.9 protein                                                             |
| 445    | Os08g0230100 | 7919850  | 7921536 | Hypothetical conserved gene                                                                    |
| 446    | Os08g0230200 | 7939705  | 7944306 | Similar to cysteine-type endopeptidase/ ubiquitin thiolesterase                                |
| 447    | Os08g0230300 | 7947639  | 7951629 | Hypothetical conserved gene                                                                    |
| 448    | Os08g0230350 | 7948087  | 7951633 | Non-protein coding transcript                                                                  |
| 449    | Os08g0232100 | 8018574  | 8021328 | Hypothetical gene                                                                              |
| 450    | Os08g0233400 | 8107778  | 8116271 | Ankyrin repeat domain containing protein                                                       |
| 451    | Os08g0233600 | 8118287  | 8120253 | Hypothetical conserved gene                                                                    |
| 452    | Os08g0234200 | 8159973  | 8162772 | Conserved hypothetical protein                                                                 |
| 453    | Os08g0235650 | 8229426  | 8237973 | Hypothetical conserved gene                                                                    |
| 454    | Os08g0236900 | 8307815  | 8311773 | Conserved hypothetical protein                                                                 |
| 455    | Os08g0238351 | 8405972  | 8410112 | Non-protein coding transcript                                                                  |
| 456    | Os08g0238500 | 8406018  | 8410016 | Similar to Dienelactone hydrolase family                                                       |
| 457    | Os08g0238600 | 8412054  | 8420579 | Similar to Dienelactone hydrolase family                                                       |
| 458    | Os08g0239300 | 8437323  | 8445916 | Dienelactone hydrolase domain containing protein                                               |
| 459    | Os08g0240200 | 8479583  | 8481489 | Conserved hypothetical protein                                                                 |
| 460    | Os08g0240800 | 8508463  | 8518590 | Similar to Actin filament bundling protein P-115-ABP                                           |
| 461    | Os08g0241600 | 8589245  | 8594472 | Similar to apospory-associated protein C                                                       |
| 462    | Os08g0242400 | 8639193  | 8640760 | Similar to WUSCHEL-related homeobox 8                                                          |
| 463    | Os08g0242700 | 8668958  | 8672734 | Similar to uridylyltransferase-related                                                         |
| 464    | Os08g0242800 | 8677955  | 8681460 | Similar to Sigma factor SIG6                                                                   |
| 465    | Os08g0243600 | 8767789  | 8771574 | Haloacid dehalogenase-like hydrolase domain containing protein                                 |
| 466    | Os08g0243866 | 8789627  | 8792452 | Similar to chromatin remodeling complex subunit                                                |
| 467    | Os08g0245400 | 8879953  | 8888141 | Pyridoxal phosphate-dependent transferase, major region, subdomain 1 domain containing protein |
| 468    | Os08g0246300 | 8939500  | 8953088 | NB-ARC domain containing protein                                                               |

| S. No. | Locus ID     | Position |          | Functions                                                             |
|--------|--------------|----------|----------|-----------------------------------------------------------------------|
|        |              | Start    | End      |                                                                       |
| 469    | Os08g0246351 | 8939535  | 8940950  | Hypothetical protein                                                  |
| 470    | Os08g0246800 | 8969014  | 8970904  | Conserved hypothetical protein                                        |
| 471    | Os08g0247700 | 9016956  | 9020228  | Protein kinase, catalytic domain domain containing protein            |
| 472    | Os08g0248100 | 9039735  | 9043242  | Protein kinase, core domain containing protein                        |
| 473    | Os08g0248300 | 9049938  | 9051200  | Hypothetical protein                                                  |
| 474    | Os08g0248700 | 9069082  | 9070671  | Similar to Blind                                                      |
| 475    | Os08g0249501 | 9128282  | 9136609  | Hypothetical protein                                                  |
| 476    | Os08g0249750 | 9138740  | 9145238  | Non-protein coding transcript                                         |
| 477    | Os08g0250200 | 9177347  | 9180467  | ATPase, F1 complex, epsilon subunit, mitochondrial family protein     |
| 478    | Os08g0253150 | 9339279  | 9343379  | Conserved hypothetical protein                                        |
| 479    | Os08g0254500 | 9405688  | 9414700  | Similar to Preprotein translocase secY subunit, chloroplast precursor |
| 480    | Os08g0255020 | 9439937  | 9441162  | Conserved hypothetical protein                                        |
| 481    | Os08g0255500 | 9477453  | 9482623  | Similar to BRASSINOSTEROID INSENSITIVE 1-associated receptor kinase 1 |
| 482    | Os08g0256300 | 9517361  | 9522020  | Similar to OSIGBa0135A16.2 protein                                    |
| 483    | Os08g0258200 | 9628599  | 9632710  | Ankyrin domain containing protein                                     |
| 484    | Os08g0260000 | 9757448  | 9760662  | Similar to N-acetyltransferase                                        |
| 485    | Os08g0260400 | 9779953  | 9782015  | Conserved hypothetical protein                                        |
| 486    | Os08g0263000 | 9958741  | 9960475  | Similar to Cytochrome P450-like protein (CYP86B1)                     |
| 487    | Os08g0263600 | 9985994  | 9990182  | Conserved hypothetical protein                                        |
| 488    | Os08g0265300 | 10071862 | 10080093 | Disease resistance protein domain containing protein                  |
| 489    | Os08g0266300 | 10138571 | 10141527 | Disease resistance protein domain containing protein                  |
| 490    | Os08g0267800 | 10217767 | 10220568 | Cyclin-like F-box domain containing protein                           |
| 491    | Os08g0269000 | 10269576 | 10270739 | Hypothetical conserved gene                                           |
| 492    | Os08g0270000 | 10314550 | 10320983 | F-box domain, cyclin-like domain containing protein                   |
| 493    | Os08g0270200 | 10329433 | 10335439 | Exosome-associated family protein                                     |
| 494    | Os08g0274700 | 10567331 | 10578007 | Similar to TTN10                                                      |
| 495    | Os08g0277200 | 10718581 | 10720791 | Similar to Cinnamoyl-CoA reductase                                    |
| 496    | Os08g0277900 | 10759593 | 10763435 | Similar to Syntaxin 52 (AtSYP52)                                      |
| 497    | Os08g0278100 | 10767792 | 10771186 | Osteocrin domain containing protein                                   |
| 498    | Os08g0278966 | 10817993 | 10821522 | Similar to predicted protein                                          |
| 499    | Os08g0280200 | 10922470 | 10936171 | Tensin phosphatase, C2 domain domain containing protein               |
| 500    | Os08g0280300 | 10938444 | 10945133 | Hypothetical conserved gene                                           |
| 501    | Os08g0282000 | 11055447 | 11062439 | Tetraspanin domain containing protein                                 |
| 502    | Os08g0282500 | 11126808 | 11130613 | WD40 repeat-like domain containing protein                            |
| 503    | Os08g0284200 | 11209874 | 11210515 | Similar to H0315A08.1 protein                                         |
| 504    | Os08g0285100 | 11258610 | 11260127 | Conserved hypothetical protein                                        |



| S. No. | Locus ID     | Position |          | Functions                                                                                            |
|--------|--------------|----------|----------|------------------------------------------------------------------------------------------------------|
|        |              | Start    | End      |                                                                                                      |
| 505    | Os08g0288050 | 11437989 | 11440989 | Hypothetical conserved gene                                                                          |
| 506    | Os08g0288200 | 11442670 | 11453068 | Adenylate kinase family protein                                                                      |
| 507    | Os08g0289000 | 11487287 | 11491371 | Conserved hypothetical protein                                                                       |
| 508    | Os08g0289400 | 11512090 | 11528238 | SNF2-related domain containing protein                                                               |
| 509    | Os08g0290000 | 11548007 | 11554951 | Nuclear-localized pentatricopeptide repeat (PPR) protein                                             |
| 510    | Os08g0290100 | 11558486 | 11563711 | Pentatricopeptide repeat containing protein                                                          |
| 511    | Os08g0290500 | 11587812 | 11590913 | Similar to PHD finger family protein                                                                 |
| 512    | Os08g0175300 | 4391050  | 4400757  | PolI-like DNA polymerase                                                                             |
| 513    | Os08g0176800 | 4496687  | 4502242  | Similar to mRNA-associated protein mmp 41 (Rae1 protein homolog)                                     |
| 514    | Os08g0178700 | 4599751  | 4604714  | Similar to Calmodulin-binding diacylglycerol kinase                                                  |
| 515    | Os08g0183900 | 4897613  | 4900341  | Similar to dihydroflavonol-4-reductase                                                               |
| 516    | Os08g0196700 | 5597606  | 5601049  | HAP2 subunit of HAP complex, Nuclear Factor Y (NF-YA) transcription factor, Drought stress tolerance |
| 517    | Os08g0213400 | 6598294  | 6603374  | Conserved hypothetical protein                                                                       |
| 518    | Os08g0223766 | 7495162  | 7500893  | Similar to H0702G05.10 protein                                                                       |
| 519    | Os08g0240600 | 8497291  | 8500100  | Similar to predicted protein                                                                         |
| 520    | Os08g0250700 | 9191621  | 9201077  | Thioredoxin domain 2 containing protein                                                              |
| 521    | Os08g0254300 | 9399521  | 9402233  | Similar to <i>OsIGBa0112M24.2</i> protein                                                            |
| 522    | Os08g0265500 | 10097893 | 10103955 | Similar to ATPase                                                                                    |
| 523    | Os08g0267000 | 10198285 | 10201713 | F-box domain, Skp2-like domain containing protein                                                    |
| 524    | Os08g0267450 | 10198947 | 10201019 | Hypothetical gene                                                                                    |
| 525    | Os08g0269800 | 10296961 | 10300697 | Similar to Ubiquitin-protein ligase                                                                  |
| 526    | Os08g0278600 | 10796069 | 10803842 | Similar to complex 1 protein containing protein                                                      |
| 527    | Os08g0280100 | 10899946 | 10909610 | Similar to Phytase                                                                                   |
| 528    | Os08g0287800 | 11399711 | 11402862 | Hypothetical conserved gene                                                                          |
| 529    | Os08g0185300 | 4999380  | 5002096  | Conserved hypothetical protein                                                                       |
| 530    | Os08g0203300 | 5998167  | 6005500  | Similar to SHR5-receptor-like kinase (Fragment)                                                      |
